# Supplementary material for: Hospital-based caregiver intervention for people following hip fracture surgery (HIP HELPER): multicentre randomised controlled feasibility trial with embedded qualitative study in England
Source: PubMed Central journal article supplement (PMC10729129; doi:10.1136/bmjopen-2023-073611), 2023-12-08
Supplement: bmjopen-2023-073611supp001.pdf [file bmjopen-2023-073611supp001.pdf]

**Supplementary File 1:** Clinical outcome data collected for patient-participants and caregiver-participants at baseline and four-months post-randomisation.

*Patients without cognitive impairment:*

- EQ-5D-5L
- Nottingham Activities of Daily Living Scale (NEADL)
- General Self-Efficacy questionnaire
- Center for Epidemiologic Studies Depression Scale (CES-D)
- Numerical rating scale (NRS) for pain (hip and whole body)
- Complications and adverse events including mortality

*For all caregivers:*

- EQ-5D-5L
- CES-D
- Short Sense of Competence Questionnaire for caregiver burden (SCQ-16)
- Resource Utilization in Dementia questionnaire
- Complications and adverse events including mortality
- Patient and caregiver residential status

*PLUS for caregivers of patients with cognitive impairment*

- EQ-5D-5L proxy
- Disability Assessment for Dementia Scale-6 (DADS-6) functional score
- Neuropsychiatry Inventory (NPI)
- Abbey Pain Scale

**Supplementary File 2:** Reasons for ineligibility in the HIP HELPER study across the five sites.

| Site 1 | Site 2 | Site 3 | Site 4 | Site 5 | Total      | Screening                                                                                                                                           | Ineligible Reason |
|--------|--------|--------|--------|--------|------------|-----------------------------------------------------------------------------------------------------------------------------------------------------|-------------------|
| 37     | 38     | 11     | 83     | 31     | 200        | Pre-admission patient did not live in the community, alone or with a friend, relative or caregiver.                                                 |                   |
| 51     | 22     | 2      | 16     | 37     | 128        | Does not have a nominated individual who will act as an informal caregiver.                                                                         |                   |
| 45     | 12     | 7      | 22     | 33     | 119        | Patient has acute, unstable or terminal illness which would make participation in the rehabilitation strategies contraindicated and/or impractical. |                   |
| -      | -      | -      | 85     | -      | 85         | 3+ days post op                                                                                                                                     |                   |
| 12     | 1      | 5      | 9      | 27     | 54         | Patients expected by the clinical team to be discharged to a care home (residential or nursing) after their hospital admission                      |                   |
| 15     | 1      | 1      | 17     | 9      | 43         | Patient under age of 65 years                                                                                                                       |                   |
| 7      | 4      | -      | 29     | 1      | 41         | Patient not willing or able to provide consent or assent depending on the level of cognitive impairment.                                            |                   |
| 8      | 1      | 6      | 15     | 8      | 38         | Other                                                                                                                                               |                   |
| 8      | 4      | -      | 21     | -      | 33         | Caregiver not willing or able to provide consent                                                                                                    |                   |
| 3      | 2      | -      | 12     | 2      | 19         | Not undergone hip fracture surgery                                                                                                                  |                   |
| -      | -      | -      | 11     | 2      | 13         | Missing reason                                                                                                                                      |                   |
| -      | 1      | -      | 4      | 4      | 9          | Participant has significant difficulties reading and/or comprehending English                                                                       |                   |
| -      | -      | -      | 2      | 7      | 9          | Patient under age of 65 years                                                                                                                       |                   |
| -      | 1      | -      | -      | 2      | 3          | Individual caregivers unable to understand written English or have access to a translator.                                                          |                   |
| 1      | -      | 1      | -      | -      | 2          | Principal (main) caregiver has AMTS score of less than 8                                                                                            |                   |
|        |        |        |        |        | <b>796</b> | <b>Total ineligible</b>                                                                                                                             |                   |

**Supplementary File 3:** Reasons for eligible participants not consenting to the HIP HELPER study across the five sites.

| Site 1 | Site 2 | Site 3 | Site 4 | Site 5 | Total      | Not Consented                                                                 |                            |
|--------|--------|--------|--------|--------|------------|-------------------------------------------------------------------------------|----------------------------|
| 47     | 26     | 15     | 43     | 27     | 158        | Insufficient recruitment staff resources                                      | Eligible but not consented |
| 10     | 25     | 2      | 16     | 23     | 76         | Caregiver unable to attend caregiving hospital training sessions              |                            |
| 15     | 11     | 6      | 27     | 11     | 70         | Not interested in taking part in research                                     |                            |
| 6      | 9      | 1      | 25     | 14     | 55         | Other                                                                         |                            |
| 21     | -      | 3      | 13     | 1      | 38         | Leaving the area                                                              |                            |
| 3      | 13     | 1      | 7      | 4      | 28         | Missing Reason                                                                |                            |
| 19     | -      | -      | -      | 1      | 19         | Outlier ward                                                                  |                            |
| -      | -      | -      | -      | -      | 4          | Does NOT want to be randomised to receive caregiver intervention              |                            |
| -      | 3      | 1      | -      | 4      | 4          | Persistent post-operative confusion                                           |                            |
| -      | 1      | 1      | -      | -      | 2          | Does not have a nominated individual who will act as an informal caregiver.   |                            |
| -      | -      | -      | -      | -      | 2          | Does NOT want to be randomised to receive control (usual care)                |                            |
| -      | -      | -      | 1      | 2      | 2          | Caregiver not willing or able to provide consent                              |                            |
| -      | 1      | -      | -      | 1      | 1          | Participant has significant difficulties reading and/or comprehending English |                            |
|        |        |        |        |        | <b>459</b> | <b>Total not consented</b>                                                    |                            |
| -      | -      | -      | -      | -      | -          | Post-operative complication                                                   | Not Randomised             |
| -      | -      | -      | -      | -      | 1          | Persistent post-operative confusion                                           |                            |
| -      | -      | -      | -      | -      | -          | Participant no longer wants to take part in research                          |                            |
| -      | -      | -      | -      | -      | -          | Unable to approach caregiver                                                  |                            |
| -      | -      | -      | -      | -      | -          | Insufficient recruitment staff resources                                      |                            |
| 2      | 1      | -      | -      | 1      | 4          | Withdrawn                                                                     |                            |
|        |        |        |        |        | <b>5</b>   | <b>Total not randomised</b>                                                   |                            |

**Supplementary File 4:** Recruitment rate presented by each of the five HIP HELPER sites.

| Site         | Date Opened | Number of Recruited Participants |          |           |           |             |           |           |          |          |          |          | Total     |
|--------------|-------------|----------------------------------|----------|-----------|-----------|-------------|-----------|-----------|----------|----------|----------|----------|-----------|
|              |             | April 2021                       | May 2021 | June 2021 | July 2021 | August 2021 | Sept 2021 | Oct 2021  | Nov 2021 | Dec 2021 | Jan 2022 | Feb 2022 |           |
| Site 1       | 07Apr2021   | 1                                | 3        | 0         | 1         | 1           | 1         | 3         | 0        | 0        |          |          | 10        |
| Site 2       | 19Apr2021   |                                  | 1        | 2         | 2         | 0           | 1         | 2         | 0        | 0        | 0        | 0        | 8         |
| Site 3       | 15Jun2021   |                                  |          |           | 1         | 0           | 0         | 0         | 1        | 1        | 0        | 2        | 5         |
| Site 4       | 29Jun2021   |                                  |          |           | 3         | 1           | 2         | 2         | 0        | 2        | 2        | 1        | 13        |
| Site 5       | 05Aug2021   |                                  |          |           |           | 0           | 3         | 3         | 4        | 2        | 1        | 2        | 15        |
| <b>TOTAL</b> |             | <b>1</b>                         | <b>4</b> | <b>2</b>  | <b>7</b>  | <b>2</b>    | <b>7</b>  | <b>10</b> | <b>5</b> | <b>5</b> | <b>3</b> | <b>5</b> | <b>51</b> |

**Supplementary File 5:** Table illustrating the number of participant-dyads that attended intervention sessions.

|         | Hospital-Based Session |                    |                    | Telephone Booster Calls |                      |                      |
|---------|------------------------|--------------------|--------------------|-------------------------|----------------------|----------------------|
|         | Session 1<br>N (%)     | Session 2<br>N (%) | Session 3<br>N (%) | Telephone 1<br>N (%)    | Telephone 2<br>N (%) | Telephone 3<br>N (%) |
| Yes     | 24 (96.0)              | 19 (76.0)          | 14 (56.0)          | 13 (54.2)               | 14 (58.3)            | 11 (47.8)            |
| No      | 1 (4.0)                | 6 (24.0)           | 11 (44.0)          | 11 (45.8)               | 10 (41.7)            | 12 (52.2)            |
| Missing | 0                      | 0                  | 0                  | 1                       | 1                    | 2                    |

**Supplementary File 6:** Intervention fidelity by site (shown below are those that achieved intervention fidelity).

|                                | Site Number |          |   |          |          | All Sites |
|--------------------------------|-------------|----------|---|----------|----------|-----------|
|                                | 1           | 2        | 3 | 4        | 5        |           |
| Intervention fidelity<br>n (%) | 2 (40.0)    | 2 (50.0) | 0 | 3 (50.0) | 5 (62.5) | 12 (48.0) |

N.B. fidelity = 3 in-patient sessions and  $\geq 1$  telephone calls

**Supplementary File 7:** Table illustrating the data completion of clinical outcome scores (baseline and 4-month follow-up).

|                                                                 | Baseline (N; %) |           | 4-Month Follow-up (N; %) |           |
|-----------------------------------------------------------------|-----------------|-----------|--------------------------|-----------|
|                                                                 | Intervention    | Control   | Intervention             | Control   |
| <b>Patient participants without Cognitive Impairment (n=41)</b> |                 |           |                          |           |
| EQ-5D-5L Index                                                  | 20 (100)        | 19 (95.0) | 14 (70.0)                | 11 (57.9) |
| EQ-5D-5L VAS                                                    | 19 (95.0)       | 18 (90.0) | 14 (70.0)                | 12 (63.2) |
| NEADL                                                           | 15 (75.0)       | 17 (85.0) | 5 (27.8)                 | 9 (52.9)  |
| GSE                                                             | 19 (95.0)       | 19 (95.0) | 11 (61.1)                | 10 (58.8) |
| CES-D                                                           | 17 (85.0)       | 16 (80.0) | 11 (61.1)                | 9 (52.9)  |
| NRS pain – hip                                                  | 20 (100)        | 18 (90.0) | 12 (66.7)                | 10 (58.8) |
| NRS pain - body                                                 | 19 (95.0)       | 19 (95.0) | 12 (66.7)                | 10 (58.8) |
| <b>Patient participants with Cognitive Impairment (n=10)</b>    |                 |           |                          |           |
| EQ5D Proxy Index                                                | 5 (100)         | 5 (100)   | 2 (40.0)                 | 4 (80.0)  |
| EQ5D Proxy VAS                                                  | 5 (100)         | 5 (100)   | 2 (40.0)                 | 4 (80.0)  |
| DADS-6 total (carer)                                            | 3 (60.0)        | 5 (100)   | 0                        | 4 (80.0)  |
| DADS-6 initiation (carer)                                       | 4 (80.0)        | 5 (100)   | 0                        | 4 (80.0)  |
| DADS-6 planification (carer)                                    | 3 (60.0)        | 5 (100)   | 0                        | 4 (80.0)  |
| DADS-6 performance (carer)                                      | 4 (80.0)        | 5 (100)   | 0                        | 4 (80.0)  |
| NPI severity (carer)                                            | 5 (100)         | 5 (100)   | 0                        | 3 (60.0)  |
| NPI distress (carer)                                            | 5 (100)         | 5 (100)   | 0                        | 3 (60.0)  |
| Abbey Pain Scale (carer)                                        | 2 (40.0)        | 5 (100)   | 0                        | 3 (60.0)  |
| NRS pain – hip                                                  | 4 (80.0)        | 4 (80.0)  | 0                        | 4 (80.0)  |
| NRS pain - body                                                 | 4 (80.0)        | 4 (80.0)  | 0                        | 4 (80.0)  |
| <b>Caregiver participants (n=51)</b>                            |                 |           |                          |           |
| EQ-5D-5L Index                                                  | 24 (96.0)       | 23 (92.0) | 10 (47.6)                | 11 (50.0) |
| EQ-5D-5L VAS                                                    | 24 (96.0)       | 23 (92.0) | 12 (57.1)                | 12 (54.6) |
| CESD                                                            | 20 (80.0)       | 20 (80.0) | 12 (57.1)                | 9 (40.9)  |
| SCQ total                                                       | 23 (92.0)       | 20 (80.0) | 12 (57.1)                | 11 (50.0) |
| SCQ recipient satisfaction                                      | 24 (96.0)       | 22 (88.0) | 12 (57.1)                | 12 (54.6) |
| SCQ own satisfaction                                            | 23 (92.0)       | 21 (84.0) | 12 (57.1)                | 12 (54.6) |
| SCQ consequence                                                 | 24 (96.0)       | 23 (92.0) | 12 (57.1)                | 11 (50.0) |
| Patient living in own home: n (%)                               | 24 (96.0)       | 23 (92.0) | 11 (52.4)                | 11 (50.0) |
| Caregiver living with participant: n (%)                        | 23 (92.0)       | 23 (92.0) | 12 (57.1)                | 12 (54.5) |

CESD - Center for Epidemiologic Studies Depression Scale; DAD-6 – Disability Assessment for Dementia scale – 6 item; GSE – Generalized Self-Efficacy Scale; NA – not assessed; NEADL - Nottingham Extended Activities of Daily Living scale (NEADL); NPI - Neuropsychiatry Inventory; NRS – numerical rating scale; SCQ – Short Sense of Competence questionnaire for caregiver burden; VAS – visual analogue scale

NB: Deaths prior to 4 month follow-up were assigned zero response accounting for 40% response rate for 2 participants in the patient participants with cognitive impairment responses.

**Supplementary File 8:** Carer Resource Utilisation in Dementia questionnaire completion statistics at baseline and 4-months

| C-RUD Question                                                                   | Conditional on previous question responses | Baseline                |                    | Conditional on previous question responses | 4-Months                |                    |
|----------------------------------------------------------------------------------|--------------------------------------------|-------------------------|--------------------|--------------------------------------------|-------------------------|--------------------|
|                                                                                  |                                            | Intervention N=25 n (%) | Control N=25 n (%) |                                            | Intervention N=21 n (%) | Control N=22 n (%) |
| 1. Age                                                                           | No                                         | 24 (96.0)               | 23 (92.0)          | No                                         | 12 (57.1)               | 12 (54.6)          |
| 2. Gender                                                                        | No                                         | 24 (96.0)               | 23 (92.0)          | No                                         | 12 (57.1)               | 12 (54.6)          |
| 3. Relationship to patient                                                       | No                                         | 23 (92.0)               | 23 (92.0)          | No                                         | 12 (57.1)               | 12 (54.6)          |
| 4. Children living with you                                                      | No                                         | 24 (96.0)               | 23 (92.0)          | No                                         | 12 (57.1)               | 12 (54.6)          |
| 5. Do you live with the patient                                                  | No                                         | 23 (92.0)               | 23 (92.0)          | No                                         | 12 (57.1)               | 12 (54.6)          |
| 6. Other caregivers involved                                                     | No                                         | 23 (92.0)               | 23 (92.0)          | No                                         | 12 (57.1)               | 12 (54.6)          |
| 7. Your caring contribution level                                                | No                                         | 23 (92.0)               | 23 (92.0)          | No                                         | 12 (57.1)               | 12 (54.6)          |
| 8. Sleep in last 30 days                                                         | No                                         | 24 (96.0)               | 21 (84.0)          | No                                         | 12 (57.1)               | 12 (54.6)          |
| 9a. Hours per day assisting patient with tasks such as dressing in last 30 days  | No                                         | 23 (92.0)               | 20 (80.0)          | No                                         | 10 (47.6)               | 11 (50.0)          |
| 9b. Days assisting patient with tasks such as dressing in last 30 days           | No                                         | 23 (92.0)               | 20 (80.0)          | No                                         | 10 (47.6)               | 11 (50.0)          |
| 10a. Hours per day assisting patient with tasks such as shopping in last 30 days | No                                         | 23 (92.0)               | 20 (80.0)          | No                                         | 12 (57.1)               | 11 (50.0)          |
| 10b. Days assisting patient with tasks such as shopping in last 30 days          | No                                         | 22 (88.0)               | 21 (84.0)          | No                                         | 12 (57.1)               | 11 (50.0)          |
| 11a. Hours per day supervising patient in last 30 days                           | No                                         | 21 (84.0)               | 21 (84.0)          | No                                         | 11 (52.4)               | 12 (54.6)          |
| 11b. Days supervising patient in last 30 days                                    | No                                         | 21 (84.0)               | 21 (84.0)          | No                                         | 11 (52.4)               | 12 (54.6)          |
| 12. Work for pay                                                                 | No                                         | 24 (96.0)               | 23 (92.0)          | No                                         | 12 (57.1)               | 11 (50.0)          |
| 13. Stop/reduce working                                                          | Yes (N=30)                                 | 17 (100)                | 13 (100)           | Yes (N=7)                                  | 2 (100)                 | 5 (100)            |
| 14. Change of job/working situation                                              | Not Assessed in Baseline C-RUD             |                         |                    | Yes (N=7)                                  | 2 (100)                 | 5 (100)            |
| 15. Hours of paid work per week                                                  | Yes (N=17)                                 | 7 (100)                 | 10 (100)           | Yes (N=1)                                  | 1 (100)                 | 0                  |
| 16. Hours of patient care paid per week                                          | Yes (N=17)                                 | 7 (100)                 | 10 (100)           | Yes (N=1)                                  | 1 (100)                 | 0                  |
| 17. Hours cut for carer responsibilities in last 30 days                         | Yes (N=17)                                 | 7 (100)                 | 10 (100)           | Yes (N=1)                                  | 1 (100)                 | 0                  |
| 18a. Work days missed                                                            | No                                         | 6 (24.0)                | 11 (44.0)          | Yes (N=7)                                  | 2 (100)                 | 3 (60.0)           |
| 18b. Part work days missed                                                       | No                                         | 7 (28.0)                | 11 (44.0)          | Yes (N=7)                                  | 2 (100)                 | 5 (100)            |
| 19. Stop/reduce working                                                          | Not Assessed in Baseline C-RUD             |                         |                    | Yes (N=1)                                  | 1 (100)                 | 0                  |



|                                                             |                                |           |           |                                 |           |           |
|-------------------------------------------------------------|--------------------------------|-----------|-----------|---------------------------------|-----------|-----------|
| 20. Admitted to hospital in last 30 days                    | No                             | 24 (96.0) | 23 (92.0) | Yes (N=23)                      | 12 (100)  | 10 (90.9) |
| 21. Nights in each ward in last 30 days                     | Yes (N=50)                     | 23 (92.0) | 23 (92.0) | Yes (N=23)                      | 2 (16.7)  | 1 (9.1)   |
| 22. Hospital ER care in last 30 days                        | No                             | 23 (92.0) | 23 (92.0) | Yes (N=23)                      | 12 (100)  | 9 (81.8)  |
| 23. Health care professional visits in last 30 days         | No                             | 24 (96.0) | 22 (88.0) | Yes (N=23)                      | 10 (83.3) | 10 (90.9) |
| 24. Current medications                                     | No                             | 22 (88.0) | 18 (72.0) | No                              | 8 (38.1)  | 8 (36.4)  |
| 25. Patient change of living accommodation since last visit | Not Assessed in Baseline C-RUD |           |           | No                              | 12 (57.1) | 11 (50.0) |
| 26. Patient current living accommodation                    | No                             | 24 (96.0) | 23 (92.0) | Yes (N=0)                       | 0         | 0         |
| 27. Date living change occurred                             | Not Assessed in Baseline C-RUD |           |           | Yes (N=0)                       | 0         | 0         |
| 28. Reason for living change                                | Not Assessed in Baseline C-RUD |           |           | Yes (N=0)                       | 0         | 0         |
| 29. Who patient lives with                                  | No                             | 24 (96.0) | 23 (92.0) | Not Assessed in Follow-Up C-RUD |           |           |
| 30. Patient temporary accommodation in last 30 days         | No                             | 7 (28.0)  | 6 (24.0)  | Yes (N=23)                      | 8 (38.1)  | 5 (45.5)  |
| 31. Patient admitted to hospital in last 30 days            | No                             | 23 (92.0) | 21 (84.0) | No                              | 10 (47.6) | 12 (54.6) |
| 32. Patient nights in each ward in last 30 days             | No                             | 19 (76.0) | 16 (64.0) | No                              | 4 (19.1)  | 1 (4.6)   |
| 33. Patient hospital ER care in last 30 days                | No                             | 24 (96.0) | 21 (84.0) | No                              | 11 (52.4) | 11 (50.0) |
| 34. Patient health care professional visits in last 30 days | No                             | 21 (84.0) | 20 (80.0) | No                              | 7 (33.3)  | 9 (40.9)  |
| 35. Patient service visits in last 30 days                  | No                             | 22 (88.0) | 21 (84.0) | No                              | 8 (38.1)  | 11 (50.0) |

\* Questions are deemed completed if the main parts of the question have all been completed (e.g., checkboxes), and completion rates for some questions are conditional on previous responses.

**Supplementary File 9:** Table illustrating descriptive clinical outcomes presented as median and inter-quartile ranges (baseline and 4-month follow-up).

|                                                          | Baseline            |                    | 4-Month Follow-Up |                   |
|----------------------------------------------------------|---------------------|--------------------|-------------------|-------------------|
|                                                          | Intervention        | Control            | Intervention      | Control           |
| <b>Patient participants without Cognitive Impairment</b> |                     |                    |                   |                   |
| EQ-5D-5L Index                                           | -0.10 (-0.26, 0.23) | 0.05 (-0.15, 0.41) | 0.60 (0.22, 0.77) | 0.60 (0.34, 0.67) |
| EQ-5D-5L VAS                                             | 50.0 (30.0, 55.0)   | 47.5 (15.0, 50.0)  | 55.0 (30.0, 80.0) | 52.5 (35.0, 80.0) |
| NEADL                                                    | 13 (12, 20)         | 17(14, 21)         | 20 (18, 20)       | 16 (13, 20)       |
| GSE                                                      | 32 (26, 36)         | 34 (30, 40)        | 29.91 (5.87)      | 30.70 (4.83)      |
| CES-D                                                    | 23.0 (17.0, 27.0)   | 22.0 (18.0, 29.0)  | 14 (13, 18)       | 19 (16, 20)       |
| NRS pain – hip                                           | 90.0 (73.5, 100.0)  | 82.5 (54.0, 97.0)  | 20.0 (4.0, 35.0)  | 14.5 (10.0, 45.0) |
| NRS pain - body                                          | 60.0 (20.0, 90.0)   | 55.0 (35.0, 70.0)  | 17.0 (1.5, 35.0)  | 32.5 (14.0, 64.0) |
| <b>Patient participants with Cognitive Impairment</b>    |                     |                    |                   |                   |
| EQ5D Proxy Index                                         | 0.15 (-0.20, 0.34)  | 0.22 (0.01, 0.50)  | 0 (0, 0)          | 0.33 (0.07, 0.50) |
| EQ5D Proxy VAS                                           | 50.00 (15.0, 50.0)  | 60.0 (30.0, 75.0)  | 0 (0, 0)          | 57.5 (37.5, 67.5) |
| DADS-6 total (carer)                                     | 2.0 (1.0, 4.00)     | 1.0 (1.0, 4.0)     | NA                | 0.0 (0.0, 7.5)    |
| DADS-6 initiation (carer)                                | 1.5 (0.5, 3.0)      | 0.0 (0.0, 1.00)    | NA                | 0.0 (0.0, 2.5)    |
| DADS-6 planification (carer)                             | 0.0 (0.0, 1.0)      | 1.0 (0.0, 2.0)     | NA                | 0.0 (0.0, 2.5)    |
| DADS-6 performance (carer)                               | 1.5 (0.5, 2.5)      | 1.0 (0.0, 1.0)     | NA                | 0.0 (0.0, 2.5)    |
| NPI severity (carer)                                     | 10 (5, 12)          | 3 (3, 7)           | NA                | 5 (1, 11)         |
| NPI distress (carer)                                     | 9 (1, 11)           | 1 (0, 2)           | NA                | 1 (1, 11)         |
| Abbey Pain Scale (carer)                                 | 6.5 (3.0, 10.0)     | 5.0 (5.0, 6.0)     | NA                | 5 (4, 5)          |
| NRS pain – hip                                           | 100.0 (70.0, 100.0) | 60.0(45.0, 75.0)   | NA                | 20 (5, 50)        |
| NRS pain - body                                          | 35.0 (20.0, 60.0)   | 45.0 (20.5, 65.0)  | NA                | 51 (26, 70)       |
| <b>Caregiver participants</b>                            |                     |                    |                   |                   |
| EQ-5D-5L Index                                           | 0.80(0.71, 1.00)    | 1.00 (0.77, 1.00)  | 0.88 (0.71, 1.00) | 0.77 (0.68, 1.00) |
| EQ-5D-5L VAS                                             | 85.0 (80.0, 92.5)   | 85.0 (80.0, 95.0)  | 82.5 (72.5, 92.5) | 77.5 (67.5, 90.0) |
| CESD                                                     | 14.0 (12.0, 19.0)   | 13.5 (11.5, 19.5)  | 16.5 (13.5, 18.0) | 13.0 (12.0, 19.0) |
| SCQ total                                                | 60.0 (53.0, 65.0)   | 63.5 (60.0, 68.0)  | 65.5 (58.0, 74.5) | 60.0(55.0, 68.0)  |
| SCQ recipient satisfaction                               | 17.5 (15.5, 20.0)   | 18.0 (16.0, 20.0)  | 20.0 (17.0, 20.0) | 20.0 (16.0, 20.0) |
| SCQ own satisfaction                                     | 19.0 (17.0, 21.0)   | 21.0 (18.0, 22.0)  | 21.0 (19.5, 23.5) | 18.0 (17.5, 20.5) |
| SCQ consequence                                          | 26.0 (21.5, 27.0)   | 27.0 (22.0, 28.0)  | 27.0 (17.5, 32.0) | 24.0 (21.0, 26.0) |
| Patient living in own home: n=Yes (%)                    | 23 (95.8)           | 21 (91.3)          | 11 (100.0)        | 10 (100.0)        |
| Caregiver living with participant: n=Yes (%)             | 16 (69.6)           | 14 (60.9)          | 11 (91.7)         | 7 (58.3)          |

CESD - Center for Epidemiologic Studies Depression Scale; DAD-6 – Disability Assessment for Dementia scale – 6 item; GSE – Generalized Self-Efficacy Scale; NA – not assessed; NEADL - Nottingham Extended Activities of Daily Living scale (NEADL); NPI - Neuropsychiatry Inventory; NRS – numerical rating scale; SCQ – Short Sense of Competence questionnaire for caregiver burden; VAS – visual analogue scale

**Supplementary File 10:** Acceptability questionnaire (participant) by question number.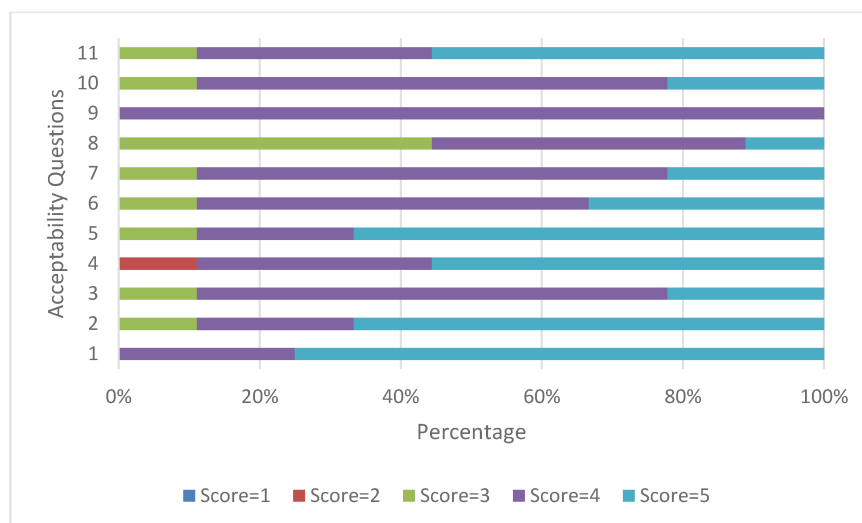

Question 1: How acceptable was the HIP HELPER in hospital training (Missing=13)

Question 2: How acceptable were the 3 HIP HELPER telephone calls? (Missing=12)

Question 3: How acceptable was the HIP HELPER Workbook? (Missing=12)

Question 4: How much effort was it to engage with the HIP HELPER in-hospital training? (Missing=12)

Question 5: How much effort did it take to engage with the HIP HELPER telephone calls? (Missing=12)

Question 6: How much effort did it take to engage with the HIP HELPER workbook? (Missing=12)

Question 7: To what extent does the HIP HELPER programme fit with your belief about recovery after a hip fracture operation? (Missing=12)

Question 8: Is the HIP HELPER programme likely to change your ability to help your friend/family member's recover after a hip fracture operation? (Missing=12)

Question 9: Does the HIP HELPER programme provide you with more confidence on your skills to help someone after a hip fracture operation? (Missing=12)

Question 10: Is it clear how the HIP HELPER intervention could help recovery after a hip fracture operation? (Missing=12)

Question 11: Did doing the HIP HELPER programme interrupt with you other priorities? (Missing=12)

**Note:** higher scores indicate greater acceptability.

**Supplementary File 11:** Acceptability questionnaire (caregiver) by question number.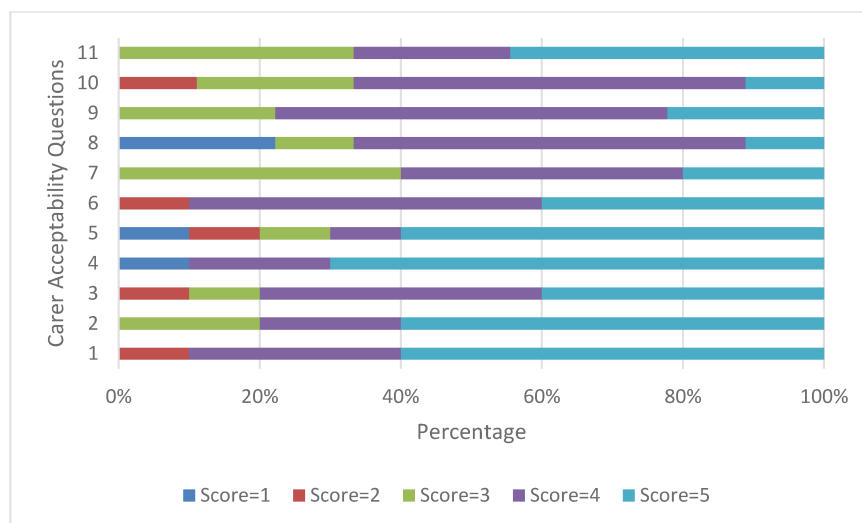

Question 1: How acceptable was the HIP HELPER in hospital training

Question 2: How acceptable were the 3 HIP HELPER telephone calls?

Question 3: How acceptable was the HIP HELPER Workbook?

Question 4: How much effort was it to engage with the HIP HELPER in-hospital training?

Question 5: How much effort did it take to engage with the HIP HELPER telephone calls?

Question 6: How much effort did it take to engage with the HIP HELPER workbook?

Question 7: To what extent does the HIP HELPER programme fit with your belief about recovery after a hip fracture operation?

Question 8: Is the HIP HELPER programme likely to change your ability to help your friend/family member's recover after a hip fracture operation?

Question 9: Does the HIP HELPER programme provide you with more confidence on your skills to help someone after a hip fracture operation?

Question 10: Is it clear how the HIP HELPER intervention could help recovery after a hip fracture operation?

Question 11: Did doing the HIP HELPER programme interrupt with you other priorities?

**Note:** higher scores indicate greater acceptability.

**Supplementary File 12:** Summary of safety outcomes at the end of the study for all participants.

| <b>Adverse Event</b>          | <b>Frequency</b> |
|-------------------------------|------------------|
| Death                         | 7                |
| Falls                         | 5                |
| Joint infection               | 4                |
| Increased pain (hip)          | 4                |
| Increased pain (other joints) | 4                |
| Anxiety/depression            | 4                |
| Atrial fibrillation           | 1                |
| Deep wound infection          | 1                |
| Wound infection               | 1                |
| Skin integrity complication   | 1                |
| PE                            | 1                |
| Stroke                        | 1                |
| Bowel obstruction             | 1                |
| Barrett's oesophagus          | 1                |
| <b>Total</b>                  | <b>36</b>        |

**Supplementary File 13:** Characteristics of qualitative investigation sample.

| <b>Person with hip fracture</b> | <b>Intervention</b> | <b>Control</b> |
|---------------------------------|---------------------|----------------|
| N                               | 7                   | 3              |
| Mean age (years)                | 77.85               | 69.33          |
| Gender (M/F)                    | 6 / 1               | 0 / 3          |
| Ethnicity                       |                     |                |
| White British                   | 7                   | 3              |
| Site (n)                        |                     |                |
| 1                               | 1                   | 1              |
| 2                               | 1                   | 1              |
| 3                               | 1                   | 1              |
| 4                               | 3                   | -              |
| 5                               | 1                   | -              |
| <b>Healthcare Professionals</b> | <b>Frequency</b>    |                |
| <b>Professional Role</b>        |                     |                |
| Physiotherapist                 | 4                   |                |
| Occupational therapist          | 2                   |                |
| Nurse                           | 1                   |                |
| Researcher                      | 1                   |                |
| <b>Site</b>                     |                     |                |
| 1                               | 2                   |                |
| 2                               | 2                   |                |
| 3                               | 1                   |                |
| 4                               | 2                   |                |
| 5                               | 1                   |                |
